# Supplementary material
Source: publisher site journal article supplement (https://www.dovepress.com/article/333279)
Supplement: Supplementary file 1 [file get_supplementary_file.php]

# Supplementary Materials for

ORIGINAL RESEARCH

Lingling Wu et al

Platelet-tumor cell hybrid membrane-camouflaged nanoparticles for enhancing therapy efficacy in glioma

Lingling Wu2

Qin Li1

Junjie Deng3,4

Jinglan Shen1

Weide Xu3

Wei Yang5

Bingyu Chen1

Yaoqiang Du1

Wei Zhang6

Feihang Ge6

Siyun Lei1

Kaiqiang Li1

Zhen Wang1

1Department of Transfusion medicine, Allergy Center, Ministry of Education Key Laboratory of Laboratory Medicine, Zhejiang Provincial People's Hospital People's Hospital of Hangzhou Medical College, Hangzhou 310014, China; 2Women's Hospital, School Of Medicine, Zhejiang University, Hangzhou 310014, China; 3Zhejiang Engineering Research Center for Tissue Repair Materials, Wenzhou Institute, University of Chinese Academy of Sciences, Wenzhou, Zhejiang 325000, China; 4Oujiang Laboratory, Wenzhou, Zhejiang 325000, China; 5Department of Biophysics, and Department of Neurosurgery of the First Affiliated Hospital, Zhejiang University School of Medicine, Hangzhou, P. R. China; 6Hangzhou Chinese Academy of Sciences-Hangzhou Medical College Advanced Medical Technology Institute, Hangzhou 310014, China

**Correspondence:** Kaiqiang Li & Zhen Wang

Zhejiang Provincial People's Hospital, China

Tel: 0571-87666666

Fax: 0571-85131448

Email: likaiqiang@hmc.edu.cn; [wangzhen@hmc.edu.cn](mailto:wangzhen@hmc.edu.cn)

Table S1. β-Mangostin NMR data

| Atomic number | *δ*H | *δ*C |
| --- | --- | --- |
| 1 | 13.42 (1H, s) | 159.7 |
| 2 |  | 111.5 |
| 3 |  | 163.5 |
| 4 | 6.34 (1H, s) | 88.8 |
| 4a |  | 154.4 |
| 5 | 6.83 (1H, s) | 101.4 |
| 6 |  | 155.7 |
| 7 |  | 142.6 |
| 8 |  | 137.0 |
| 8a |  | 112.4 |
| 9 |  | 181.9 |
| 9a |  | 103.8 |
| 10a |  | 155.2 |
| 11 | 3.35 (2H, d, 7.2Hz) | 21.3 |
| 12 | 5.23 (1H, t, 7.2Hz) | 122.3 |
| 13 |  | 132.0 |
| 14 | 1.83 (3H, s) | 25.1 |
| 15 | 1.69 (3H, s) | 18.1 |
| 16 | 4.09 (2H, d, 7.2Hz) | 31.9 |
| 17 | 5.26 (1H, t, 7.2Hz) | 123.2 |
| 18 |  | 131.6 |
| 19 | 1.68 (3H, s) | 17.7 |
| 20 | 1.80 (3H, s) | 26.5 |
| OMe-3 | 3.90 (3H, s) | 55.8 |
| OMe-7 | 3.81 (3H, s) | 62.0 |


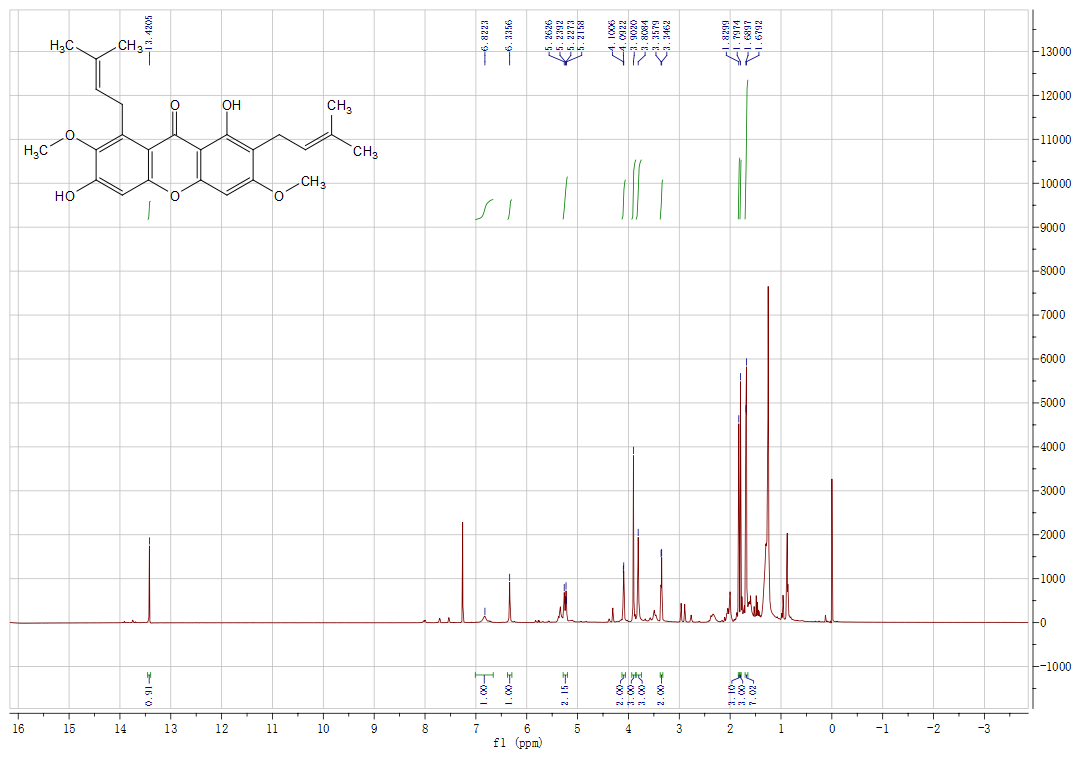


Figure S1. The 1H NMR spectrum of β-Mangostin in Chloroform-*d.*

**
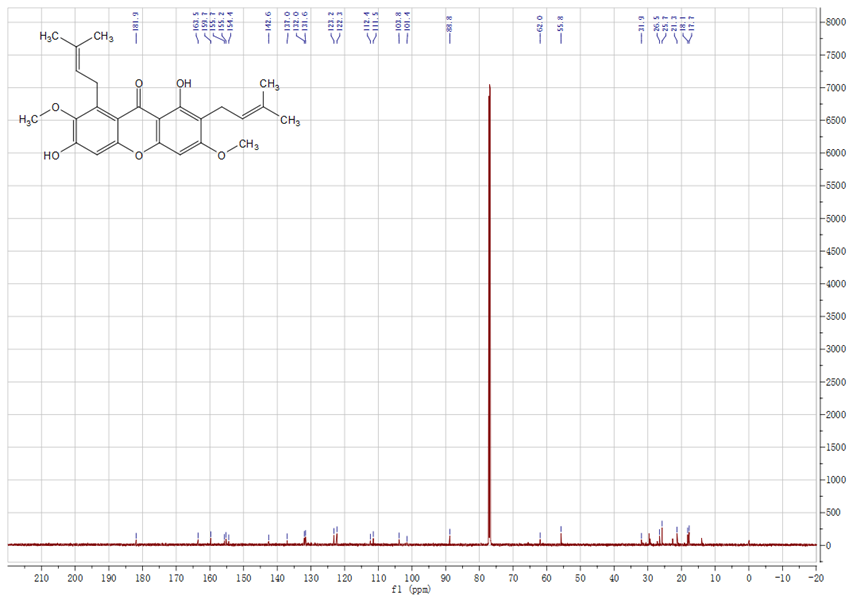
**

Figure S2. The 13C NMR spectrum of β-Mangostin in Chloroform-*d.*


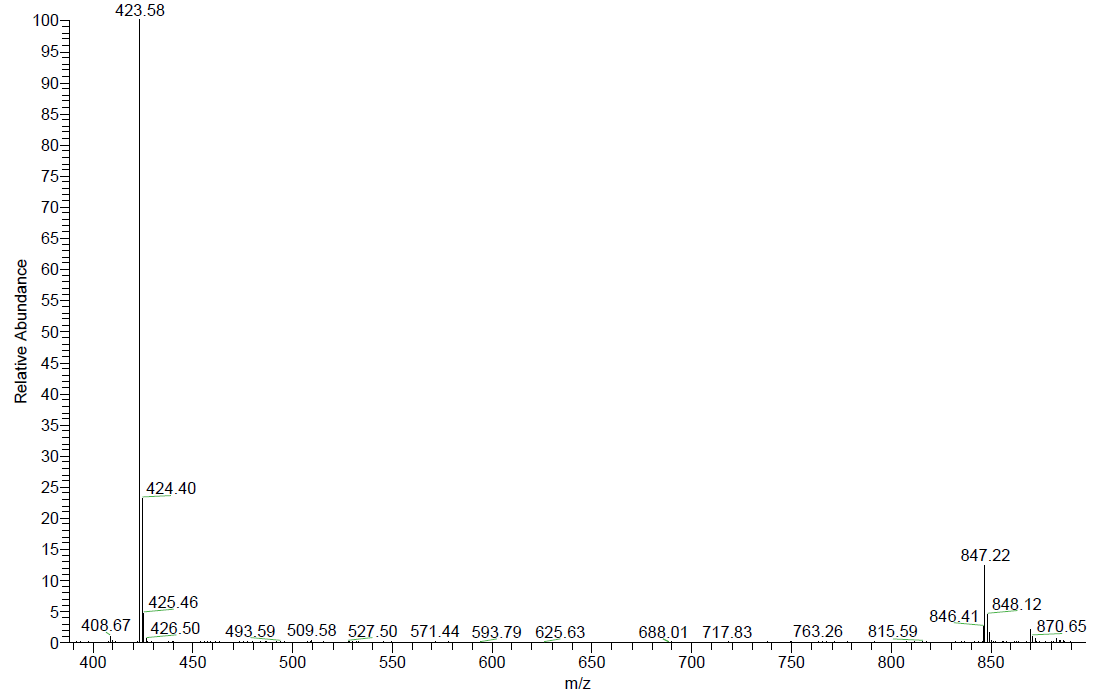


Figure S3. The mass spectrum of β-Mangostin*.*


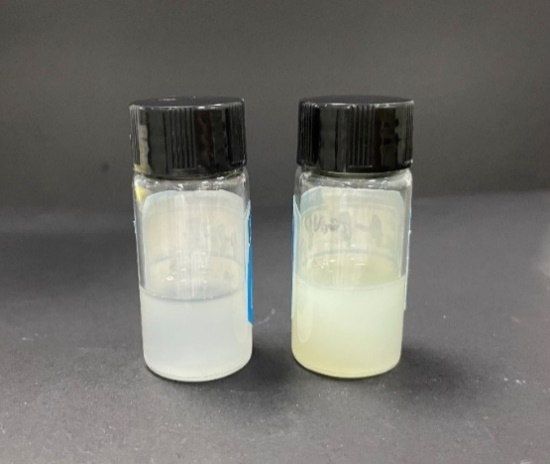


Figure S4. Schematic diagram of PCNPs(left) and β-PCNPs(right).


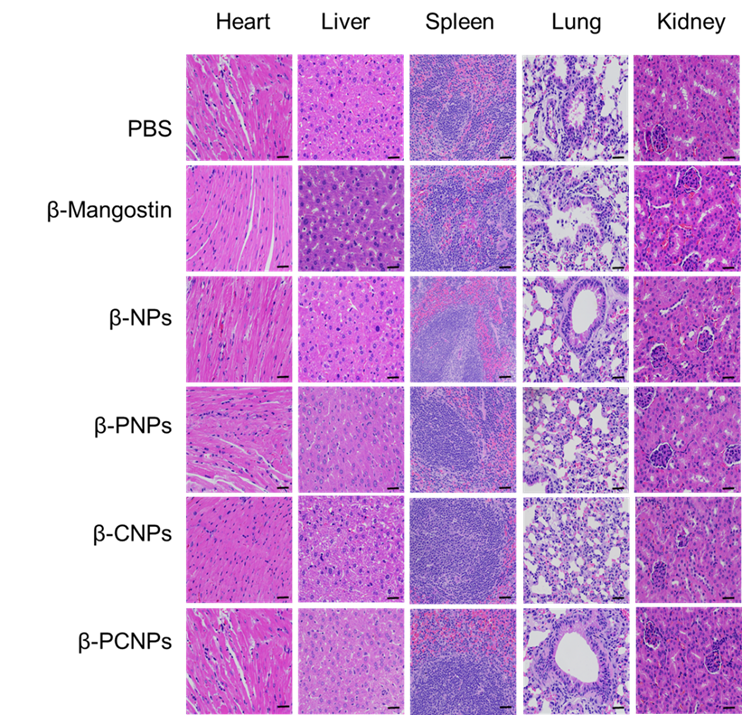


Figure S5. H&E sections of main organs from C6 glioma-bearing mice.


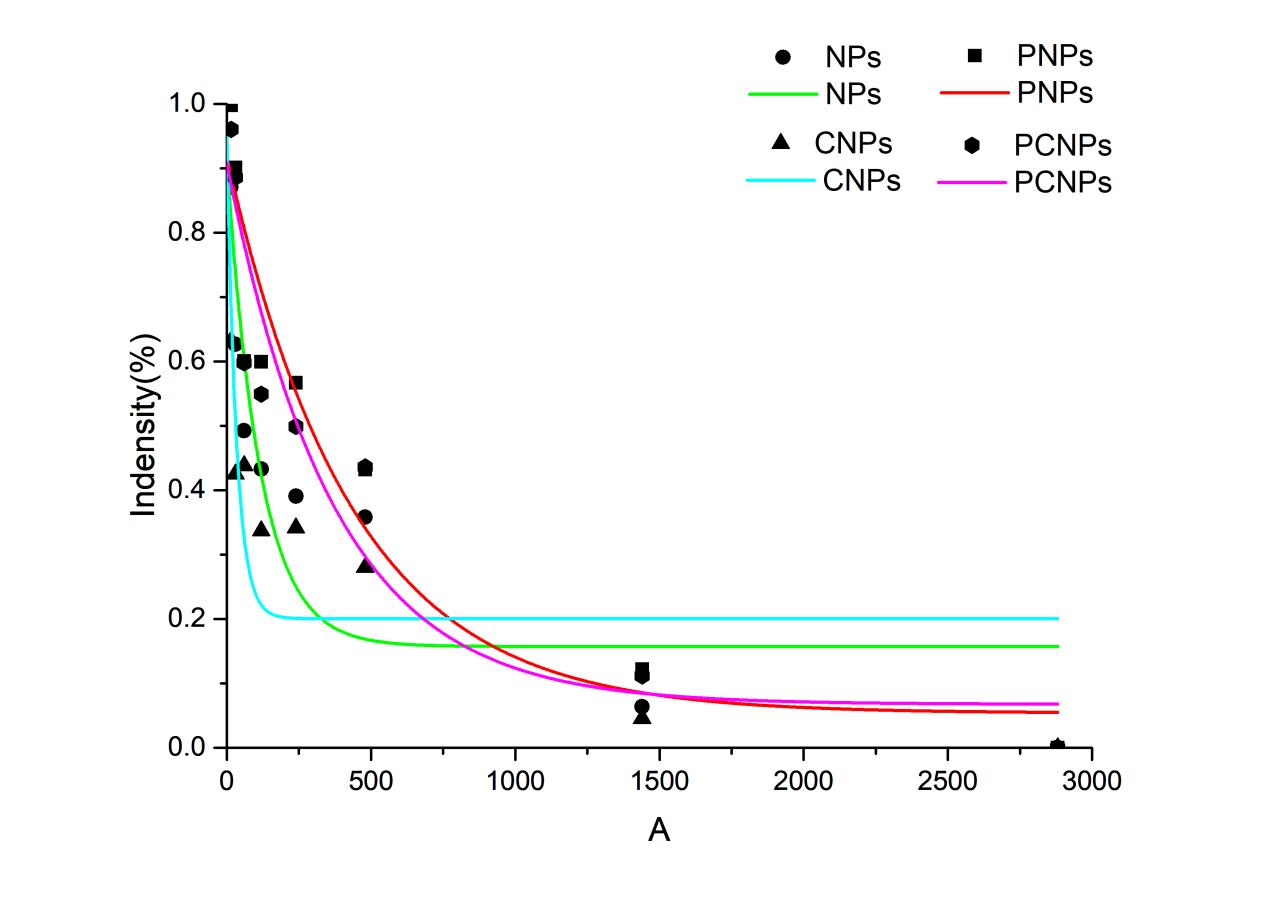

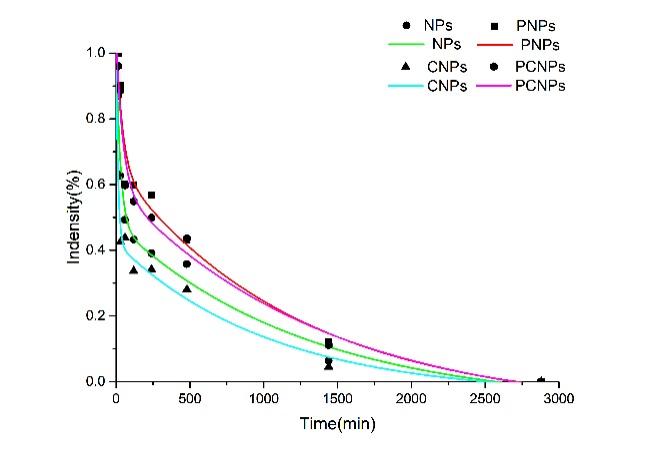


Figure S6. Blood circulation time of fluorescently labeled NPs, PNPs, CNPs and PCNPs.

T1/2（NPs）=114.47min; T1/2（PNPs）=435.83min; T1/2（CNPs）=33.67min; T1/2（PCNPs）=369.80min

Tave（NPs）=1259.06min; Tave（PNPs）=1214.07min; Tave（CNPs）=1030.16min; Tave（PCNPs）=1376.61min
